# Supplementary material for: Global repositioning of transcription start sites in a plant-fermenting bacterium
Source: PubMed Central journal article supplement (PMC5171806; doi:10.1038/ncomms13783), 2016-12-16
Supplement: ncomms13783-s1.pdf [file ncomms13783-s1.pdf]

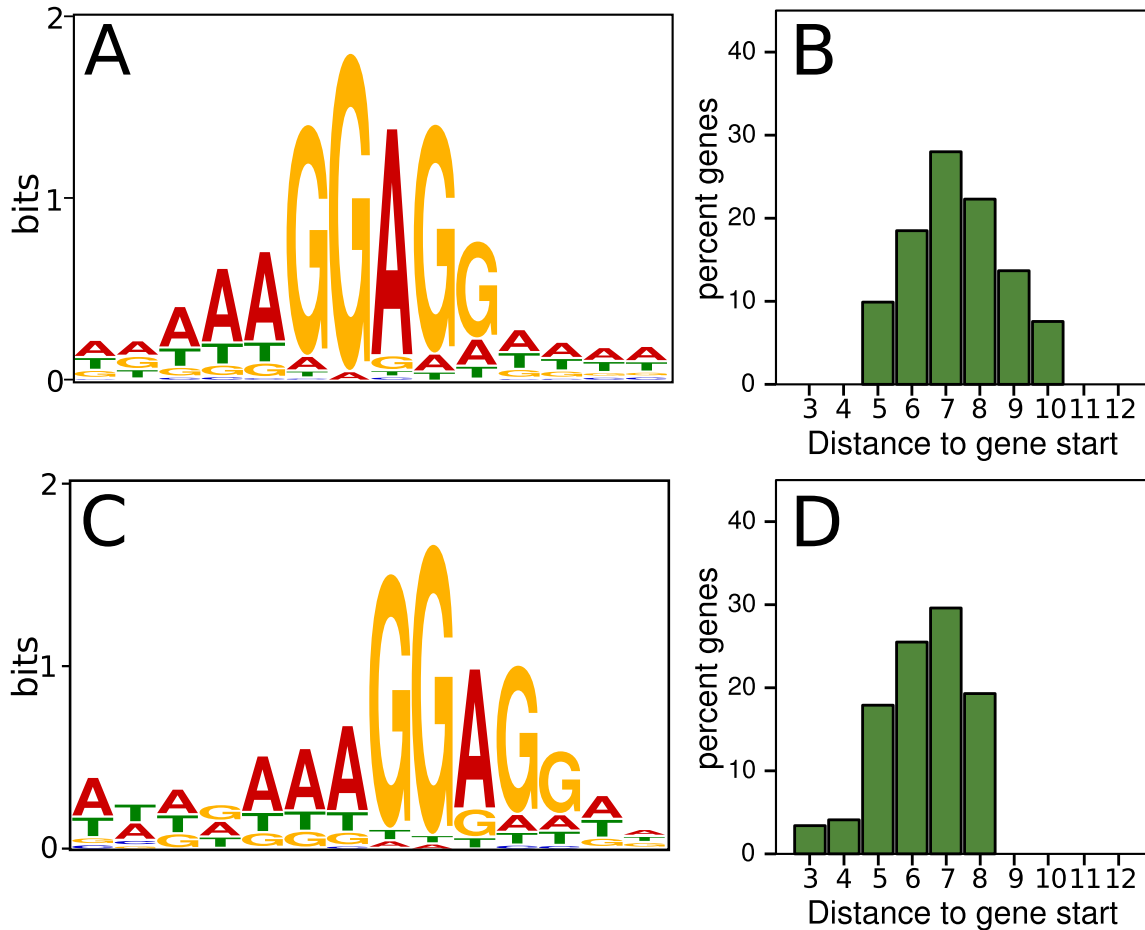

**Supplementary Fig 1** Genes with leaderless transcripts have ribosome-binding motifs (RBS) similar to other genes. **A** *C. phytofermentans* genes encoding highly-expressed proteins have a classic RBS (5'-AGGAGG-3'). The 20 bp upstream of the 500 most highly-expressed proteins on glucose based on APEX values from mass spectrometry-based proteomics were searched using MEME and the top motif (e-value  $4.6 \times 10^{-173}$ , 475 sites) is shown. **B** The core AGGAGG motif is separated from the start codon by  $7.3 \pm 1.38$  bp for these 500 genes. Analysis of the 500 most highly expressed proteins on cellulose gave an indistinguishable RBS motif (motif e-value  $3.2 \times 10^{-734}$ , 465 sites) with similar start codon distances. **C** Among 3,540 InterS TSS identified by Capp-Switch sequencing, 173 TSS (4%) associated with 152 genes have TSS 5 bp or fewer from the start codon (leaderless). The 20 bp upstream of these 152 genes were searched using MEME and the top motif (e-value  $2.4 \times 10^{-167}$ , 145 sites) also resembles a ribosome-binding site. **D** The core AGGAGG motif for these 152 genes is closer to the start codon ( $6.3 \pm 1.3$  bp).

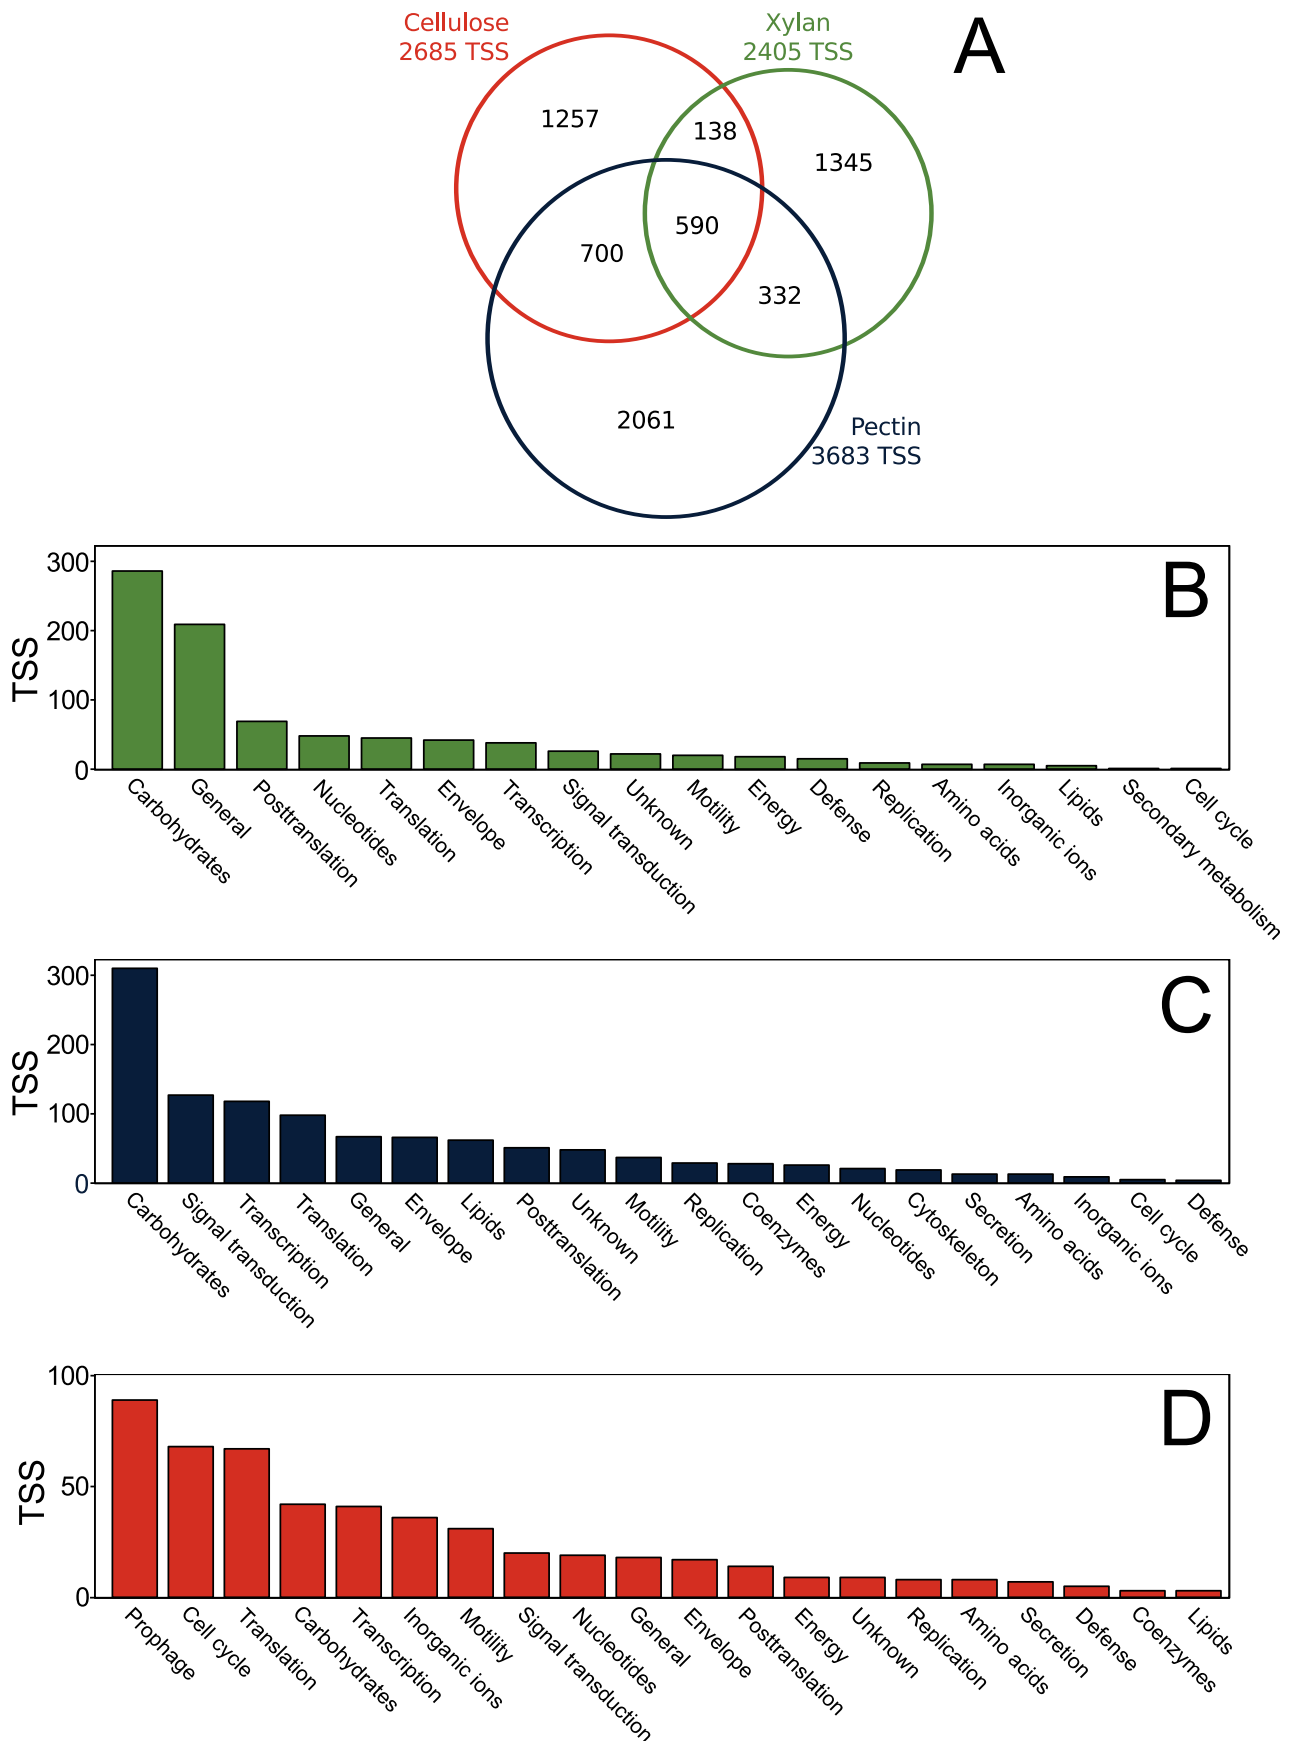

**Supplementary Fig 2** Comparison of TSS during growth on 3 polysaccharides: cellulose, xylan, and pectin. **A** Venn diagram showing overlap of TSS identified on each substrate. Number of TSS specific to **B** xylan, **C** pectin, or **D** cellulose with associated genes divided into Clusters of Orthologous Genes (COG) functional categories.

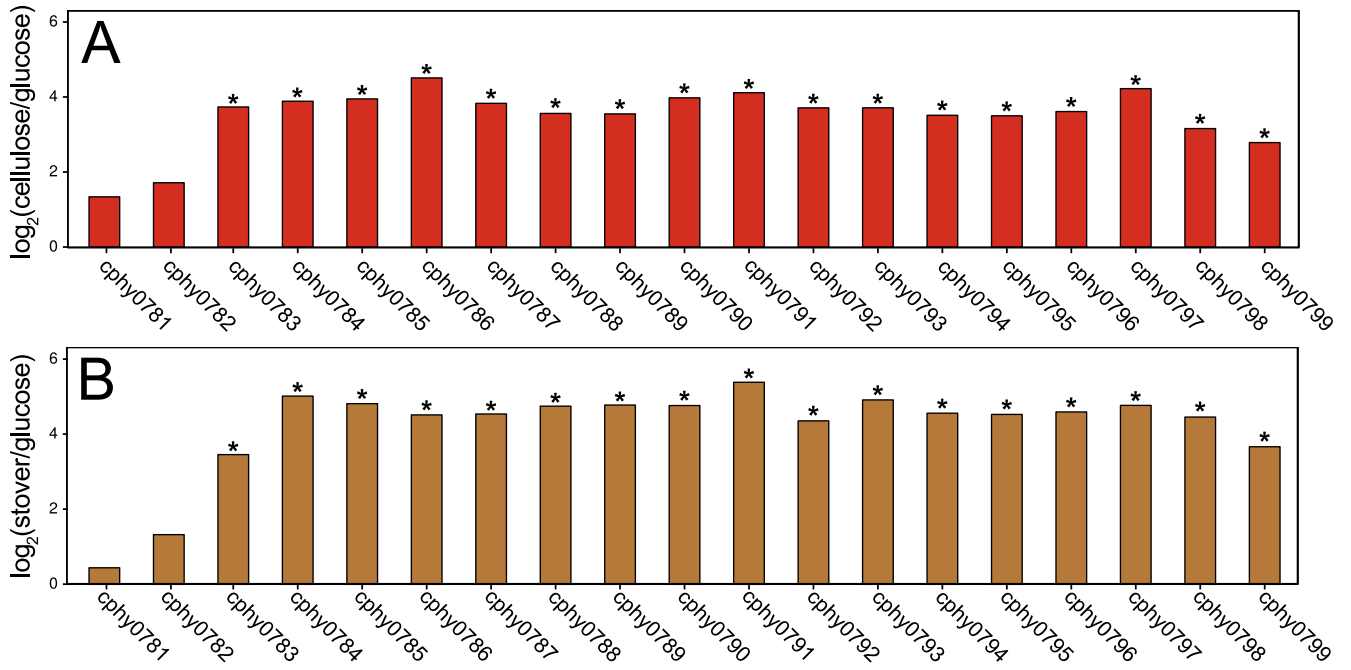

**Supplementary Fig 3** *C. phytofermentans* genes in the prophage island (cphy0781-cphy0799) are up-regulated on **A** cellulose and **B** biomass (corn stover). The mRNA expression levels are RNA-seq  $\log_2$ -transformed ratios of RPKM values on cellulose or corn stover relative to glucose. Asterisks show significant up-regulation. In total, 250 genes were up-regulated on cellulose and 294 genes on stover across the genome.

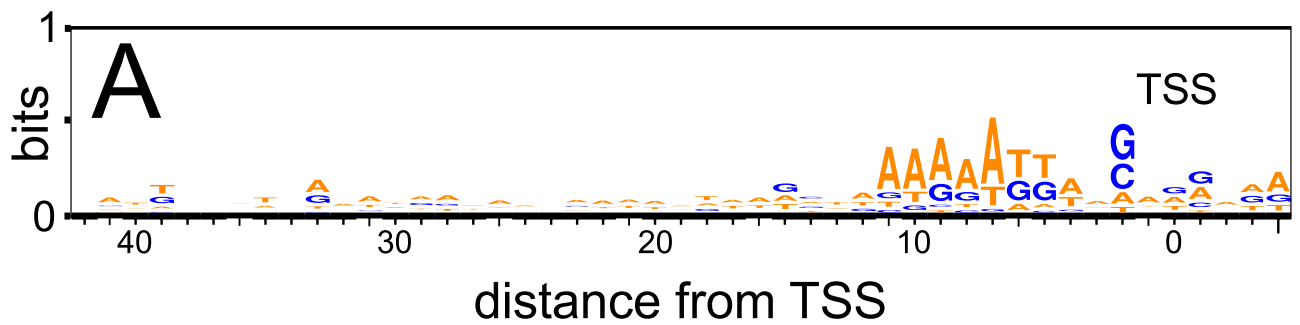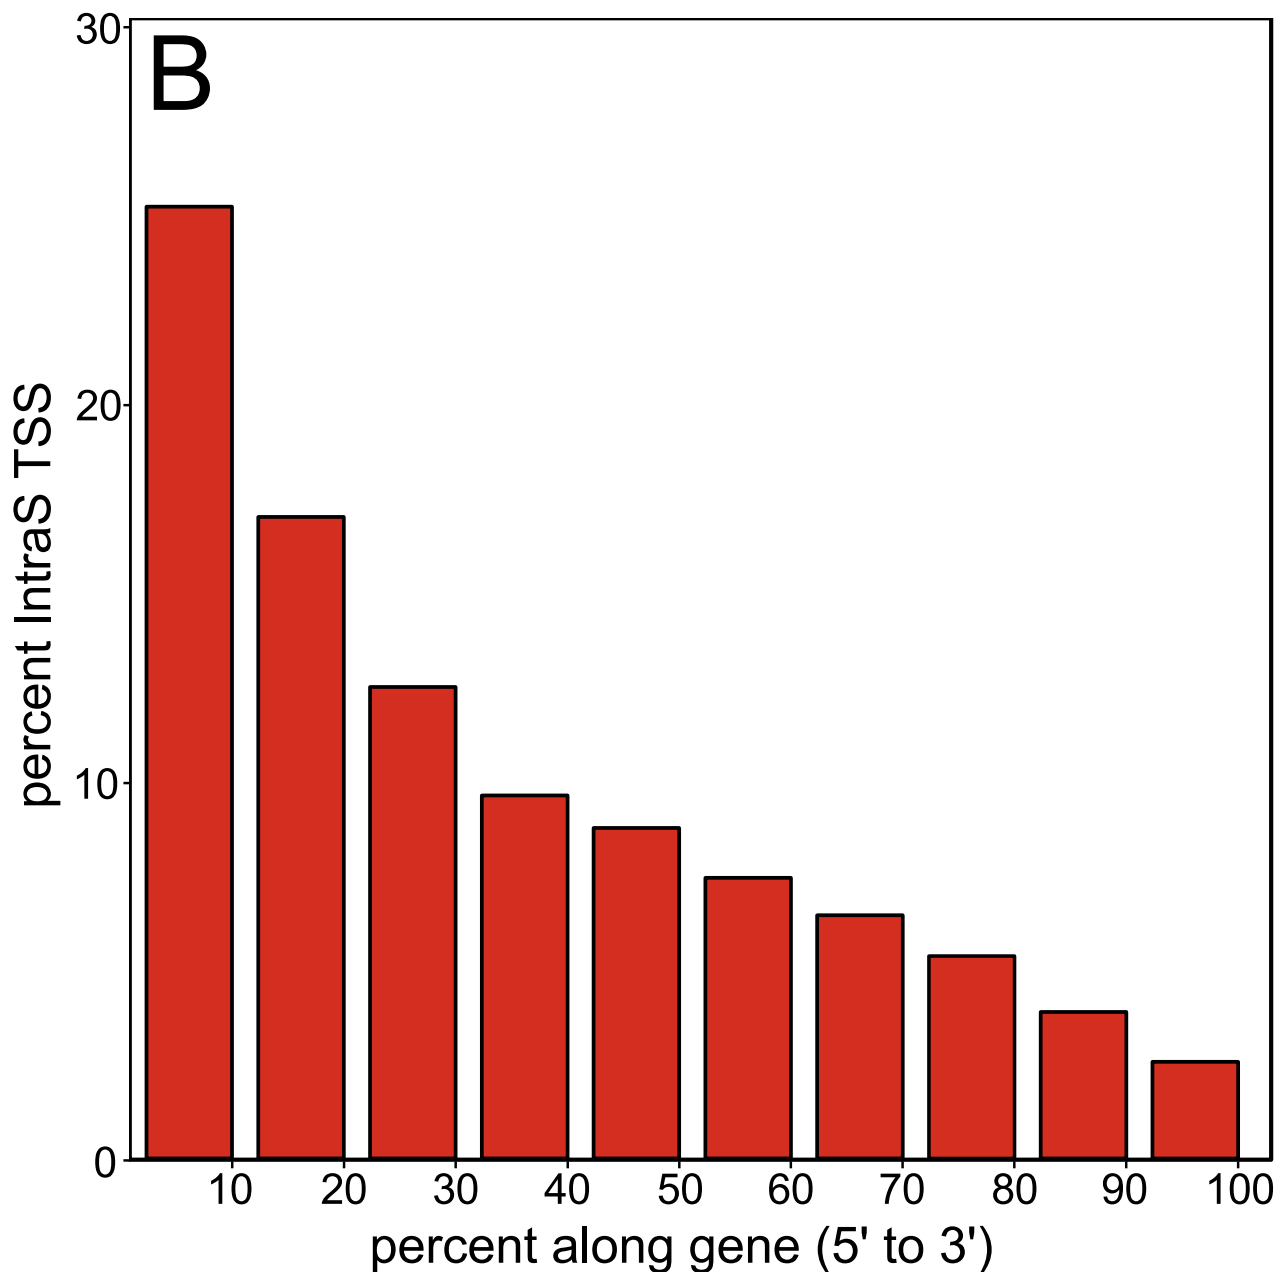

**Supplementary Fig 4 A** Sequences upstream of conserved IntraS TSS have an AT-rich stretch approximately 10 bp upstream from the TSS, but lack -10 and -35 RNA polymerase binding motifs found upstream of InterS TSS. Alignment shows sequences surrounding the 82 IntraS TSS meeting the following criteria: TSS is expressed on all three sugars, TSS has the most cumulative reads on sugars for that gene, and the associated gene has an annotated function. **B** Intragenic sense (IntraS) TSS are preferentially located in the 5' end of genes. Plot shows the percentages of IntraS located along genes from 5' to 3'.

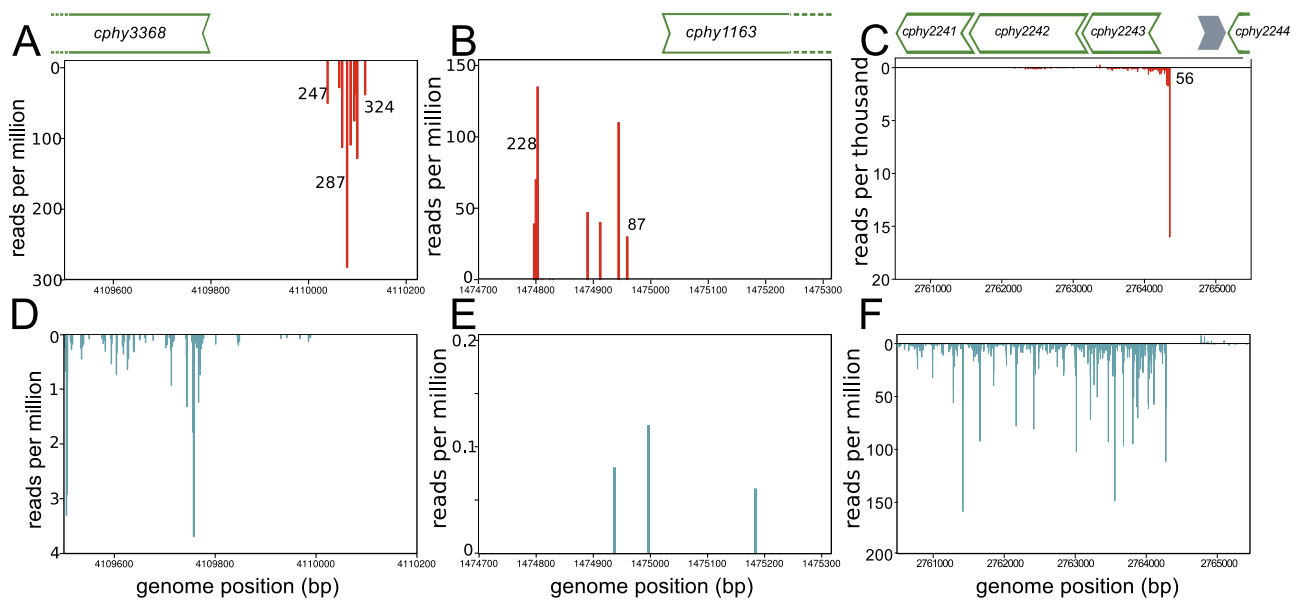

**Supplementary Fig 5** Transcription of cellulase-encoding genes *cphy3368* (A, D), *cphy1163* (B, E), and the ABC transporter genes *cphy2241-3* (C, F). The number of reads starting at each genomic position is shown for Capp-Switch sequencing (A-C) and RNA-seq (D-F) and the distance to the start codon is shown for select TSS. Genomic positions of annotated genes and the transcription unit opposing the ABC transport operon (gray arrow) are shown above the plots.

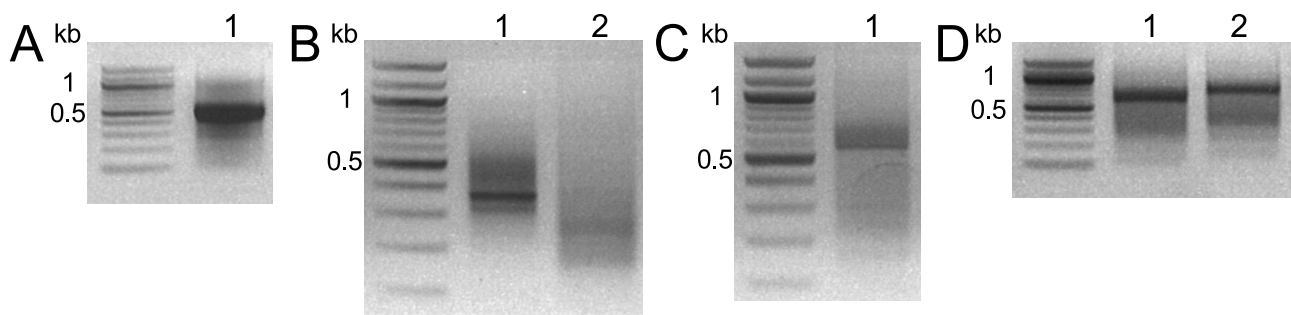

**Supplementary Fig 6** Mapping transcript ends by 5' RACE confirms expected start positions based on Capp-Switch TSS. **A** Lane 1: *cphy2876* (*gadph*) expected size 548 bp. **B** Lane 1: *cphy3558* (*pfor*) primary TSS expected size 338 bp. Lane 2: *cphy3558* (*pfor*) IntraS TSS expected size 274 bp. **C** *cphy2243* expected size 586 bp. **D** Lane 1: *cphy1510* xylan expected size 651 bp. Lane 2: *cphy1510* pectin expected size 724 bp for primary TSS. Bands were excised and sequenced to confirm TSS positions.

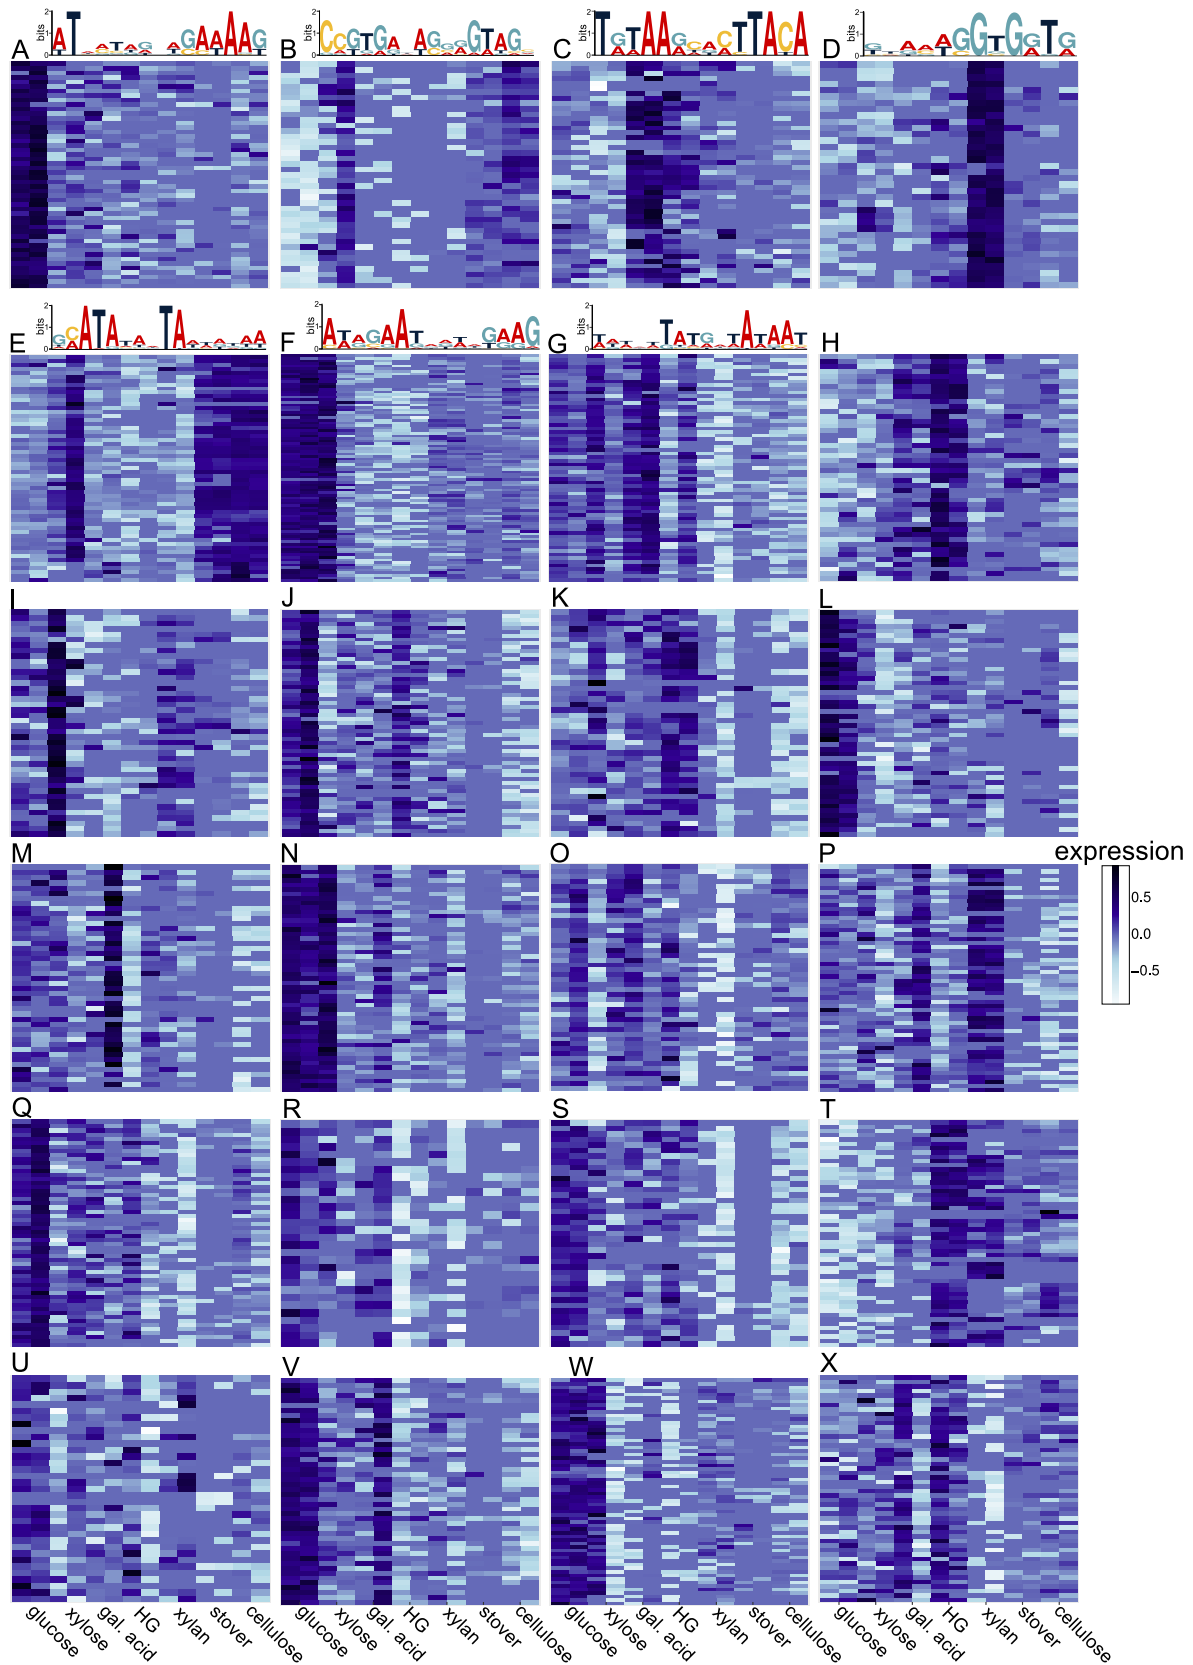

**Supplementary Fig 7** K-means TSS clusters and associated sequence motifs. The 1,188 TSS with at least a 30-fold change between at least two conditions were separated into 24 clusters by K-means. Colors show TSS expression as log<sub>2</sub>-transformed read counts scaled to a median of zero for each TSS. Significant motifs ( $e < 0.001$ ) were found in 7 clusters by searching from 100 bp upstream to 10 bp downstream of each TSS. Motifs are shown above their associated clusters. Clusters A-E are shown in Fig 4.

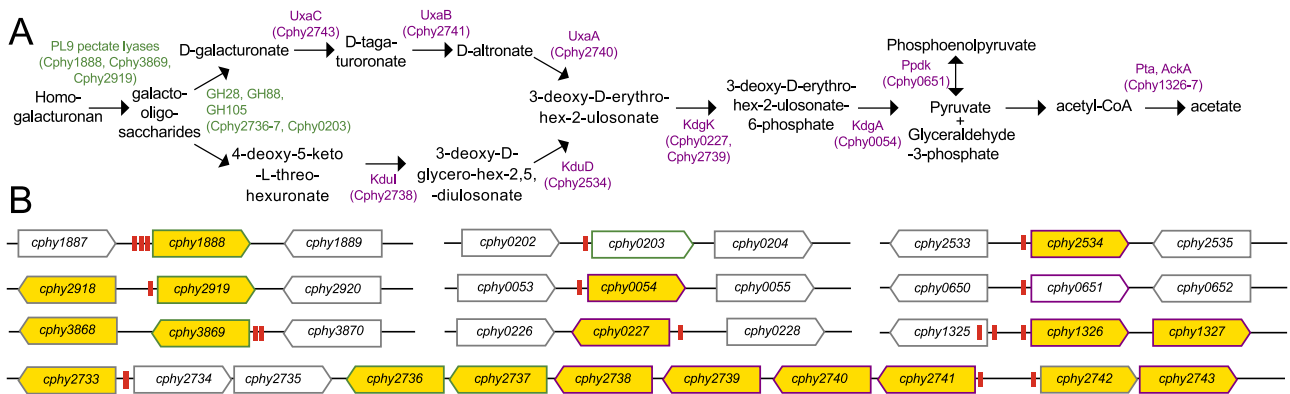

**Supplementary Fig 8 A** Proposed *C. phytofermentans* pathway for fermentation of homogalacturonan to acetate. **B** Genomic organization shows all genes in the pathway are in transcription units with upstream, putative Cphy2742 operator sites (red rectangles). Colors: green is homogalacturonan degradation, purple is galacturonic acid fermentation, yellow-filled genes are greater than 2-fold up-regulated on galacturonic acid relative to glucose measured as RPKM by RNA-seq.



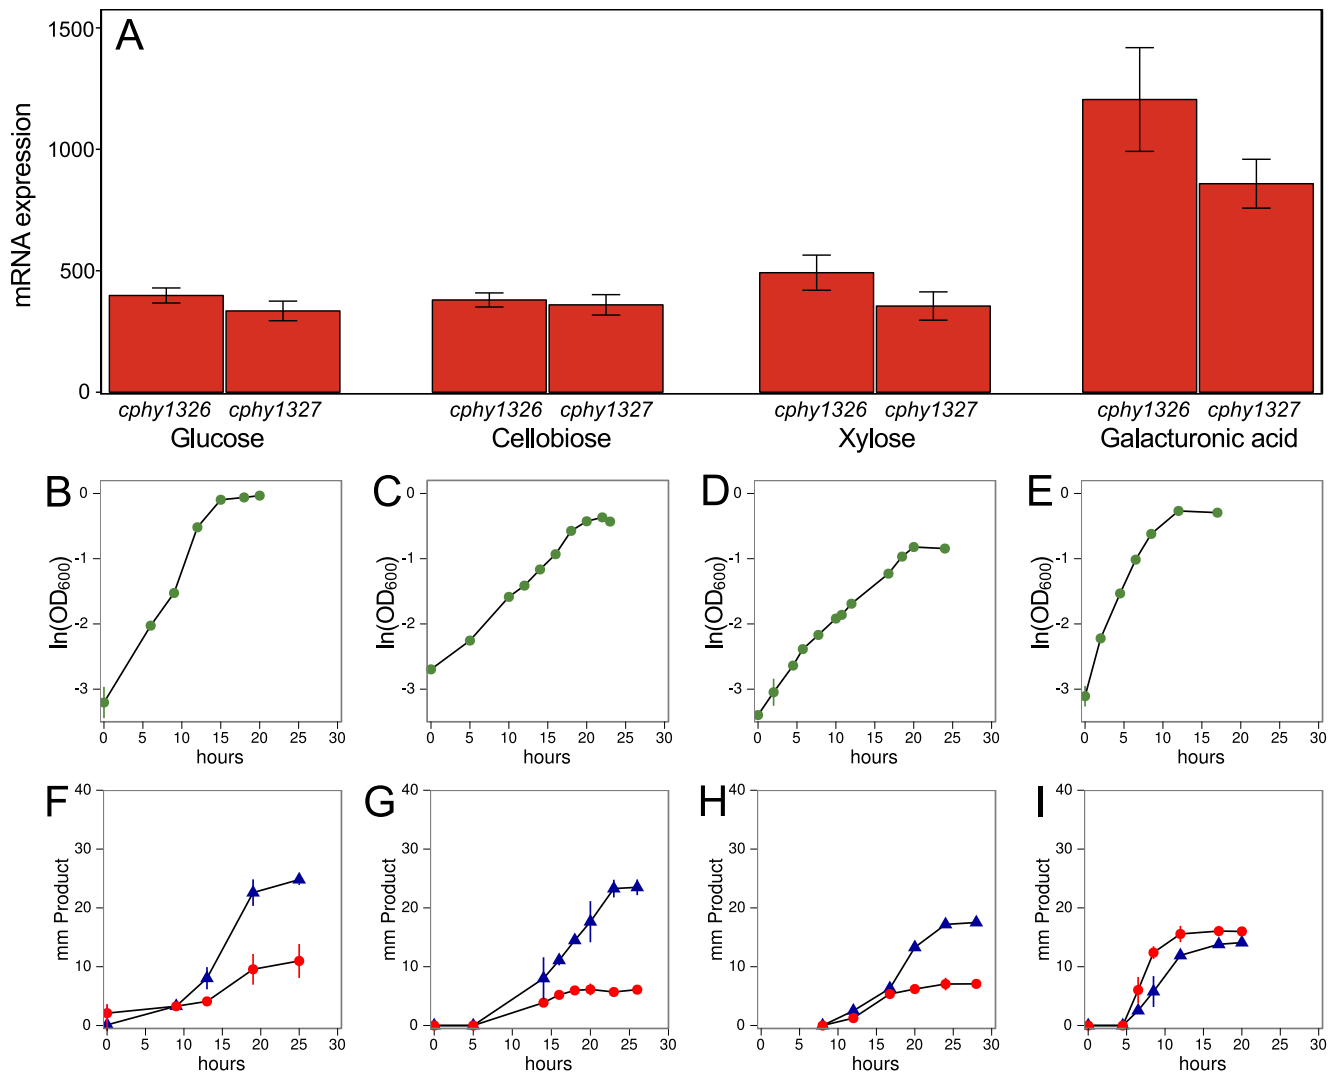

**Supplementary Fig 9** *C. phytofermentans* increases expression of acetate synthesis genes and acetate formation on galacturonic acid. **A** mRNA expression of the *pta* (*cphy1326*) and *ackA* (*cphy1327*) acetate synthesis genes on glucose, cellobiose, xylose, and galacturonic acid. Expression is mean RPKM from duplicate cultures by RNA-seq; error bars are one standard deviation. Growth ( $OD_{600}$ ) on **B** glucose, **C** cellobiose, **D** xylose, and **E** galacturonic acid. Accumulation of the two primary fermentation products, ethanol (blue triangles) and acetate (red circles), on **F** glucose, **G** cellobiose, **H** xylose, and **I** galacturonic acid. Data points for growth and fermentations are the mean of triplicate cultures; error bars are one standard deviation.

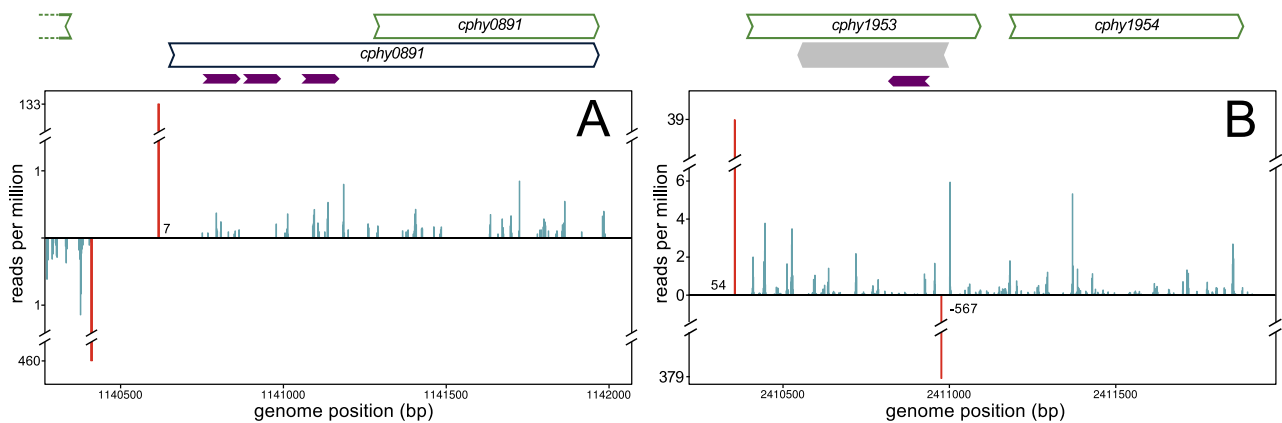

**Supplementary Fig 10** Novel transcription units with TSS are supported by in-frame peptides to encode ORFs. **A** A primary TSS, RNA-seq reads, and 3 in-frame peptides on glucose support a 597 bp N-terminal extension to *cphy0891* that includes a pyrimidine 5'-nucleotidase domain. **B** The *cphy1953 comEA* gene is expressed based on a primary TSS and RNA-seq reads, but an antisense TSS and a peptide support an overlapping, antisense ORF. Expression on glucose is shown. Plots show number of reads starting at each genome position for Capp-Switch (red) and RNA-seq (blue). Numbers at bases of TSS peaks are distances to the **A** the start codon of *cphy0891* N-terminal extension, and **B** the *cphy1953* start codon. Above plots are the positions of genes in NCBI annotation (green), new genes (dark blue), and peptides detected by mass spectrometry (purple).

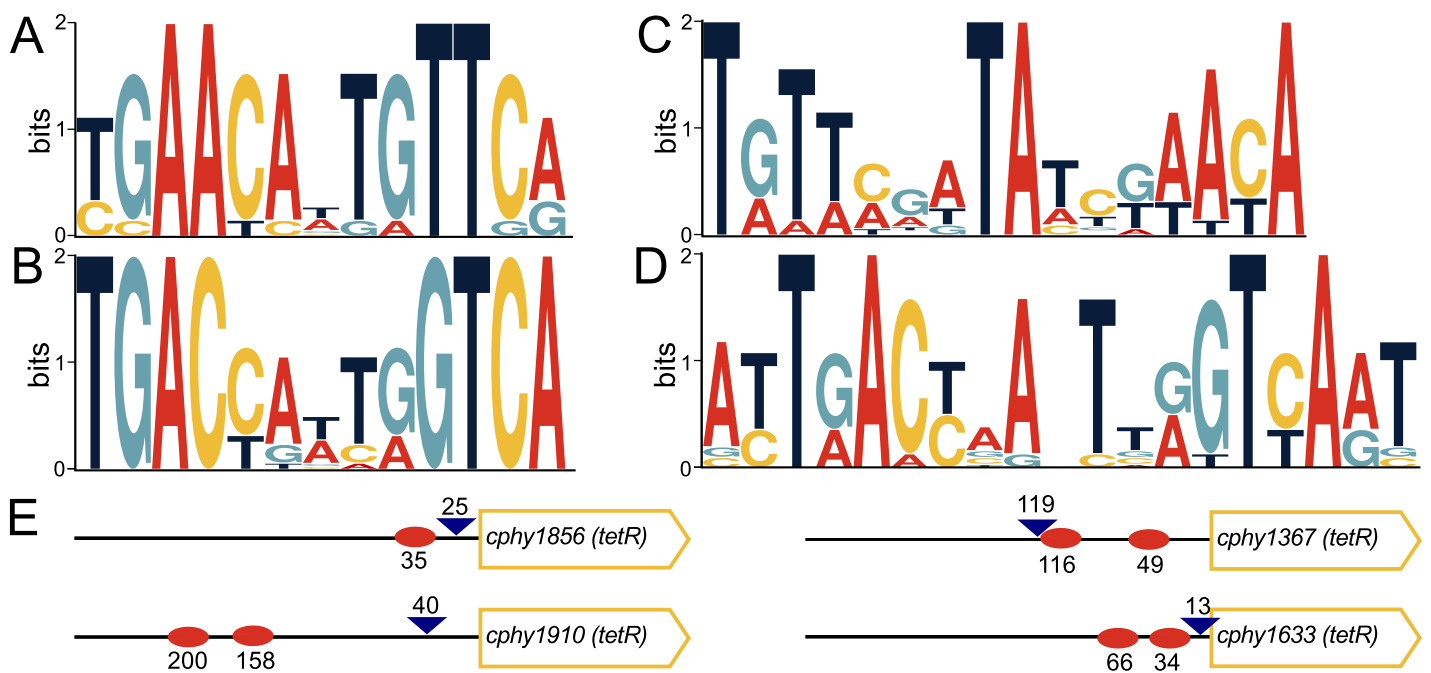

**Supplementary Fig 11** *C. phytofermentans* TetR regulator genes **A** *cphy1856*, **B** *cphy1910*, **C** *cphy1367*, and **D** *cphy1633* share conserved, upstream palindromes with their orthologs representing putative TetO operator sites. **E** Relative positions of the palindrome motifs (red ovals) and primary TSS (blue triangles) upstream of *tetR* genes.

| GENE                                | PROTEIN ANNOTATION                                                                                                                          | MOTIF POSITIONS | PRIMARY TSS POSITION                              |
|-------------------------------------|---------------------------------------------------------------------------------------------------------------------------------------------|-----------------|---------------------------------------------------|
| <b>Pectin Degradation</b>           |                                                                                                                                             |                 |                                                   |
| <i>cphy2919</i>                     | PL9: Family 9 pectate lyase. Degrades homogalacturonon (PMID 25393313)                                                                      | 181             | 145 (galacturonic acid)<br>98 (homogalacturonan)  |
| <i>cphy3869</i>                     | PL9: Family 9 pectate lyase. Degrades homogalacturonon (PMID 25393313)                                                                      | 165, 47         | 189 (galacturonic acid)<br>156 (homogalacturonan) |
| <i>cphy1888</i>                     | PL9: Family 9 pectate lyase. Degrades homogalacturonon (PMID 25393313)                                                                      | 245, 218, 146   | 184                                               |
| <i>cphy0203</i>                     | GH105: Rhamnogalacturonyl hydrolase                                                                                                         | 127             | -                                                 |
| <b>Galacturonic Acid Metabolism</b> |                                                                                                                                             |                 |                                                   |
| <i>cphy2534</i>                     | KduD: 2-dehydro-3-deoxy-D-gluconate 5-dehydrogenase                                                                                         | 237             | 199                                               |
| <i>cphy0054</i>                     | KdgA: 2-keto-3-deoxy-6-phosphogluconate aldolase                                                                                            | 128             | 125                                               |
| <i>cphy2741</i>                     | UxaB: D-tagaturonate reductase                                                                                                              | 161             | 158                                               |
| <i>cphy0227</i>                     | KdgK: 2-keto-3-deoxy-D-gluconate kinase                                                                                                     |                 | -                                                 |
| <b>Gene Regulation</b>              |                                                                                                                                             |                 |                                                   |
| <i>cphy2742</i>                     | LacI family transcription regulator                                                                                                         | 190, 166, 140   | 215                                               |
| <i>cphy0946</i>                     | ECF subfamily RNA polymerase sigma-24 factor                                                                                                | 39              | -                                                 |
| <i>cphy2734</i>                     | AraC family transcriptional regulator                                                                                                       | 128             | -                                                 |
| <b>Carbon Metabolism</b>            |                                                                                                                                             |                 |                                                   |
| <i>cphy1326</i>                     | phosphate acetyltransferase                                                                                                                 | 201             | 139                                               |
| <i>cphy0651</i>                     | pyruvate phosphate dikinase                                                                                                                 | 227             | 90                                                |
| <i>cphy0367</i>                     | alpha/beta hydrolase fold, lysophospholipase                                                                                                | 217             | 67                                                |
| <b>Other</b>                        |                                                                                                                                             |                 |                                                   |
| <i>cphy0368</i>                     | cell wall hydrolase/autolysin, peptidoglycan aminohydrolase                                                                                 | 75              | -                                                 |
| <i>cphy0381</i>                     | MATE (Multi-antimicrobial extrusion) efflux family protein, Na <sup>+</sup> -coupled multidrug efflux transporter                           | 173, 77         | -                                                 |
| <i>cphy0431</i>                     | extracellular solute-binding protein, amino acid transport                                                                                  | 68              | 212                                               |
| <i>cphy0750</i>                     | peptidylprolyl isomerase FKBP-type, catalyzes the cis-trans isomerisation of Proline imidic peptide bonds in oligopeptides, protein folding | 82              | 31                                                |
| <i>cphy0795</i>                     | hypothetical                                                                                                                                | 76              | -                                                 |
| <i>cphy1273</i>                     | PspC: phage shock protein C                                                                                                                 | 203, 122        | -                                                 |
| <i>cphy1325</i>                     | hypothetical                                                                                                                                | 159, -37        | -                                                 |
| <i>cphy3058</i>                     | hypothetical                                                                                                                                | 47              | 44                                                |

**Supplementary Table 1** The 22 *C. phytofermentans* genes with putative Cphy2742 operator sites identified by searching -250 to +50 bp with respect to start codons for all genes in the *C. phytofermentans* genome using MEME with default parameters. Table includes gene name, annotation, distance of operator upstream of start codon, and distance of primary TSS upstream of start codon.

| Sample                      | Total Reads | Mapped Reads | Percentage Mapped |
|-----------------------------|-------------|--------------|-------------------|
| Glucose 1                   | 3,647,084   | 3,426,512    | 93.95             |
| Glucose 2                   | 2,942,008   | 2,836,086    | 96.40             |
| Xylose 1                    | 1,814,676   | 1,747,356    | 96.29             |
| Xylose 2                    | 2,194,098   | 2,094,373    | 95.45             |
| Galacturonic acid 1         | 1,763,682   | 1,655,766    | 93.88             |
| Galacturonic acid 2         | 1,137,648   | 1,077,362    | 94.70             |
| Cellulose 1                 | 1,556,286   | 1,461,136    | 93.89             |
| Cellulose 2                 | 1,895,814   | 1,729,337    | 91.22             |
| Xylan 1                     | 1,070,404   | 1,045,033    | 97.63             |
| Xylan 2                     | 2,286,760   | 2,238,769    | 97.90             |
| Pectin (homogalacturonan) 1 | 3,424,780   | 3,278,318    | 95.72             |
| Pectin (homogalacturonan) 2 | 1,612,046   | 1,477,097    | 91.63             |
| Corn stover 1               | 462,936     | 404,111      | 87.29             |
| Corn stover 2               | 500,090     | 453,625      | 90.71             |

**Supplementary Table 2** Number of sequenced and mapped reads for paired-end Capp-Switch samples. Mapped reads are defined as those reported by Bowtie 2 to align with a single location in the *C. phytofermentans* genome (NC\_010001.gbk). The 3 bp MMLV reverse transcriptase 3' non-template extension was removed from the 5' end of reads in the first read set (R1) prior to mapping.

| Primer                    | Sequence                                                    | Function                 |
|---------------------------|-------------------------------------------------------------|--------------------------|
| cphy1510_F                | 5' aagacca <u>aagc</u> ttttgaagaaccagtgccagaa 3'            | PCR primer 1             |
| cphy1510_RT               | 5' ggcttcattttcattctctaattgtg 3'                            | Reverse transcription    |
| cphy2243_F                | 5' atacgta <u>aagc</u> ttctaccatttgccttgcata 3'             | PCR primer 1             |
| cphy2243_RT               | 5' tccgcatcttctacaccaa 3'                                   | Reverse transcription    |
| cphy2876_F                | 5' tccaaca <u>aagc</u> tttgagagcgagataaacacct 3'            | PCR primer 1             |
| cphy2876_RT               | 5' tcacctgtgtaagcgtggat 3'                                  | Reverse transcription    |
| Cphy3558_F (IntraS)       | 5' actacga <u>aagc</u> tttgacaacatgctctgcatca 3'            | PCR primer 1             |
| Cphy3558_RT (IntraS)      | 5' tgacaacatgctctgcatca 3'                                  | Reverse transcription    |
| Cphy3558_F (primary TSS)  | 5' gatgtta <u>aagc</u> ttggacgcggtgtaggtttag 3'             | PCR primer 1             |
| Cphy3558_RT (primary TSS) | 5' gaacattaccggagcaaagc 3'                                  | Reverse transcription    |
| PCR_R                     | 5' gaccacgcgatcgatg <u>tcgac</u> tttttttttttttttttt[agc] 3' | PCR primer 2 (all genes) |

**Supplementary Table 3** Primers used for 5' RACE reverse transcription and PCR. Table includes primer sequences with restriction sites underlined.

| <b>Cphy_1883 (LacI) orthologs</b>                       |              |                  |
|---------------------------------------------------------|--------------|------------------|
| <b>Organism</b>                                         | <b>Gene</b>  | <b>Accession</b> |
| Halobacteroides halobius DSM 5150                       | Halha_1434   | WP_015327101     |
| Bacillus megaterium WSH 002                             | BMWSH_3101   | WP_014460302     |
| Bacillus megaterium DSM319                              | BMD_2102     | WP_013082971     |
| Thermobacillus composti KWC4                            | Theco_3366   | WP_015256142     |
| Clostridium saccharolyticum WM1                         | Closa_1189   | WP_013271891     |
|                                                         |              |                  |
| <b>Cphy_2467 (LacI) orthologs</b>                       |              |                  |
| <b>Organism</b>                                         | <b>Gene</b>  | <b>Accession</b> |
| Ruminococcus albus 7                                    | Rumal_0460   | WP_043550597     |
| Clostridium saccharolyticum WM1                         | Closa_3860   | WP_013274428     |
| Eubacterium rectale ATCC 33656                          | EUBREC_1073  | WP_012741936     |
| Roseburia hominis A2 183                                | RHOM_03325   | WP_014078832     |
| Butyrivibrio proteoclasticus B316<br>Chromosome 1       | bpr_I2446    | WP_013281832     |
|                                                         |              |                  |
| <b>Cphy_2742 (LacI) orthologs</b>                       |              |                  |
| <b>Organism</b>                                         | <b>Gene</b>  | <b>Accession</b> |
| Clostridium saccharolyticum WM1                         | Closa_1652   | WP_013272339     |
| Butyrivibrio proteoclasticus B316                       | bpr_I1592    | ADL34329         |
| Roseburia hominis A2 183                                | RHOM_08220   | WP_014079796     |
| Clostridium stercorarium subsp.<br>Stereorarium DSM 853 | Cst_c21170   | WP_015359767     |
| Clostridium lentocellum DSM 5427                        | Clole_1215   | WP_013656242     |
|                                                         |              |                  |
| <b>Cphy_1367 (TetR) orthologs</b>                       |              |                  |
| <b>Organism</b>                                         | <b>Gene</b>  | <b>Accession</b> |
| Desulfotomaculum gibsoniae DSM 7213                     | Desgi_2931   | WP_006520819     |
| Desulfotomaculum acetoxidans DSM 771                    | Dtox_2544    | WP_015758039     |
| Ruminococcus albus 7                                    | Rumal_0807   | WP_013497521     |
| Selenomonas sputigena ATCC 35185                        | Selssp_1836  | WP_006191032     |
| Veillonella parvula DSM 2008                            | Vpar_0251    | WP_008603003     |
|                                                         |              |                  |
| <b>Cphy_1633 (TetR) orthologs</b>                       |              |                  |
| <b>Organism</b>                                         | <b>Gene</b>  | <b>Accession</b> |
| Clostridium cellulovorans 743B                          | Clocel_0472  | WP_010074982     |
| Brachyspira hyodysenteriae WA1                          | BHWA1_00546  | WP_012670093     |
| Brachyspira pilosicoli P43/6/78                         | BPP43_01525  | WP_015273946     |
| Eubacterium limosum KIST612                             | ELI_3977     | WP_013382228     |
| Coriobacterium glomerans PW2                            | Corgl_1663   | WP_013709504     |
|                                                         |              |                  |
| <b>Cphy_1856 (TetR) orthologs</b>                       |              |                  |
| <b>Organism</b>                                         | <b>Gene</b>  | <b>Accession</b> |
| Brachyspira murdochii DSM                               | Bmur_2301    | WP_041750013     |
| Brachyspira hyodysenteriae WA1                          | BHWA1_02346  | WP_012671830     |
| Eubacterium rectale ATCC 33656                          | EUBREC_2019  | WP_012742856     |
| Brachyspira pilosicoli P43/6/7                          | BPP43_09495  | WP_015274758     |
| Anaerococcus prevotii DSM 20548                         | Appe_1074    | WP_015778004     |
|                                                         |              |                  |
| <b>Cphy_1910 (TetR) orthologs</b>                       |              |                  |
| <b>Organism</b>                                         | <b>Gene</b>  | <b>Accession</b> |
| Butyrivibrio proteoclasticus B316                       | bpr_I2111    | WP_013281498     |
| Clostridium lentocellum DSM 5427                        | Clole_0058   | WP_013655119     |
| Eubacterium eligens ATCC 27750                          | EUBELI_00030 | WP_041687853     |
| Ruminococcus albus 7                                    | Rumal_1063   | WP_013497767     |
| Clostridium botulinum B str. Eklund 17B                 | CLL_A0765    | WP_012423768     |

**Supplementary Table 4** *C. phytofermentans* LacI/GalR and TetR orthologs from related genomes used to identify putative operator motifs. Table includes organisms, NCBI accession numbers, and NCBI gene names.
